# Supplementary material
Source: PubMed Central journal article supplement (PMC4209596)
Supplement: NIHMS342444-supplement-01.pdf [file NIHMS342444-supplement-01.pdf]

**Supplemental Table 1. Theoretical Molar Extinction Coefficients**

| Molecule          | Theoretical Molar Extinction coefficient (cm <sup>2</sup> mg <sup>-1</sup> ) | Molecular weight (kDa) |
|-------------------|------------------------------------------------------------------------------|------------------------|
| mAb A             | 1.57                                                                         | 149                    |
| mAb B             | 1.37                                                                         | 149                    |
| mAb C             | 1.27                                                                         | 149                    |
| H <sub>CC</sub>   | 1.53                                                                         | 26.9                   |
| H <sub>CN</sub>   | 1.56                                                                         | 29.2                   |
| LC-H <sub>N</sub> | 0.92                                                                         | 102.0                  |
