# Supplementary material
Source: PubMed Central journal article supplement (PMC4209596)

**Supplemental Figure 1. Specificity of LC-H<sub>N</sub> for binding to mAb C as revealed by SEC-HPLC analysis.** Top panel: mAb A/LC-H<sub>N</sub>, middle panel = mAb B/LC-H<sub>N</sub>; bottom panel = mAb C/LC-H<sub>N</sub>.

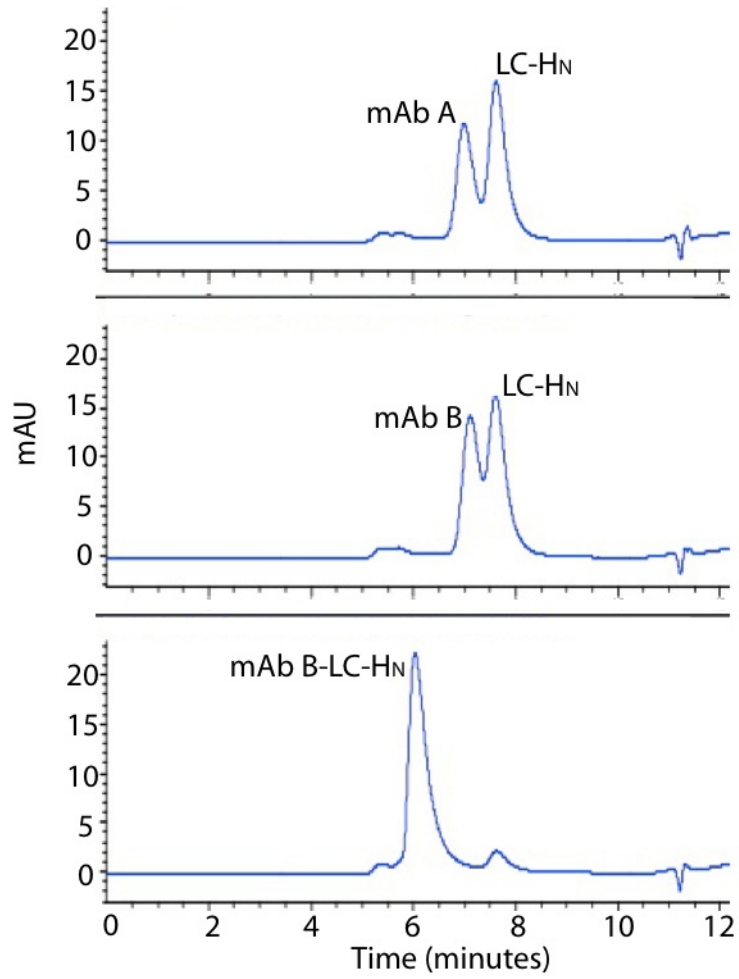

Supplement: NIHMS342444-supplement-02.pdf [file NIHMS342444-supplement-02.pdf]
