# Supplementary material
Source: PubMed Central journal article supplement (PMC4209596)

**Supplemental Figure 2. RP-HPLC chromatograms of BoNT/A H<sub>CC</sub>-A01 stability samples.**

The lyophilized product stored at 5°C for 1 month or stored at 40°C for 1 month has superior stability compared to the liquid formulation stored at 2-8°C for 1 month.

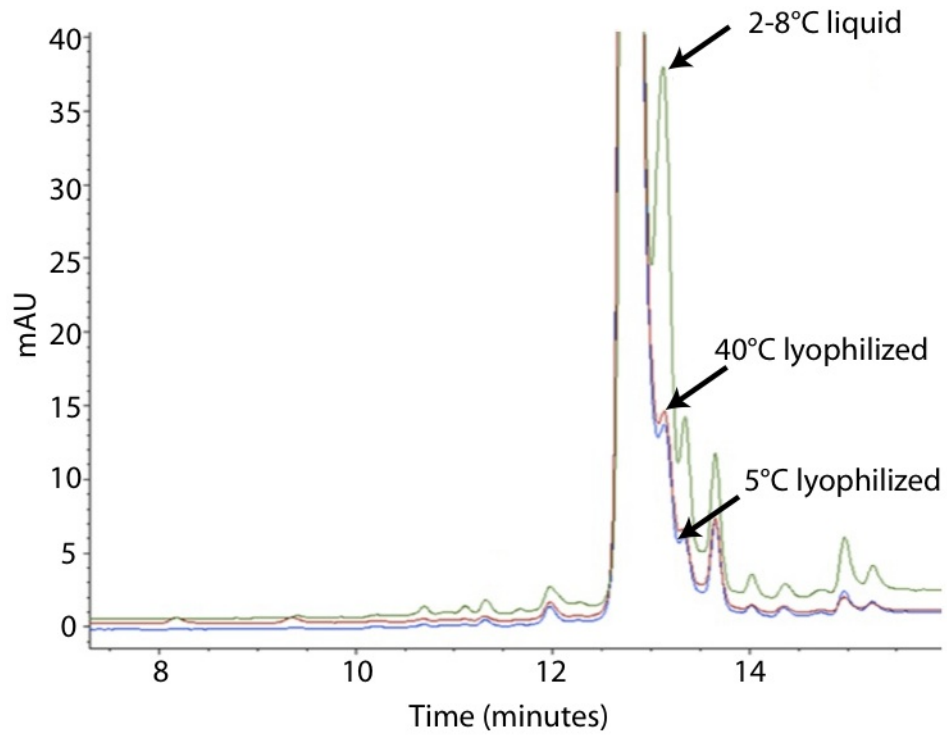

Supplement: NIHMS342444-supplement-03.pdf [file NIHMS342444-supplement-03.pdf]
