# Supplementary material
Source: PubMed Central journal article supplement (PMC4209596)

**Supplemental Figure 3.** Binding curves of XOMA3AB component mAbs with BoNT/A

holotoxin by KinExA

Percentage of free holotoxin is plotted as a function of mAb concentration. Circle: mAb A,

square: mAb B, triangle: mAb C

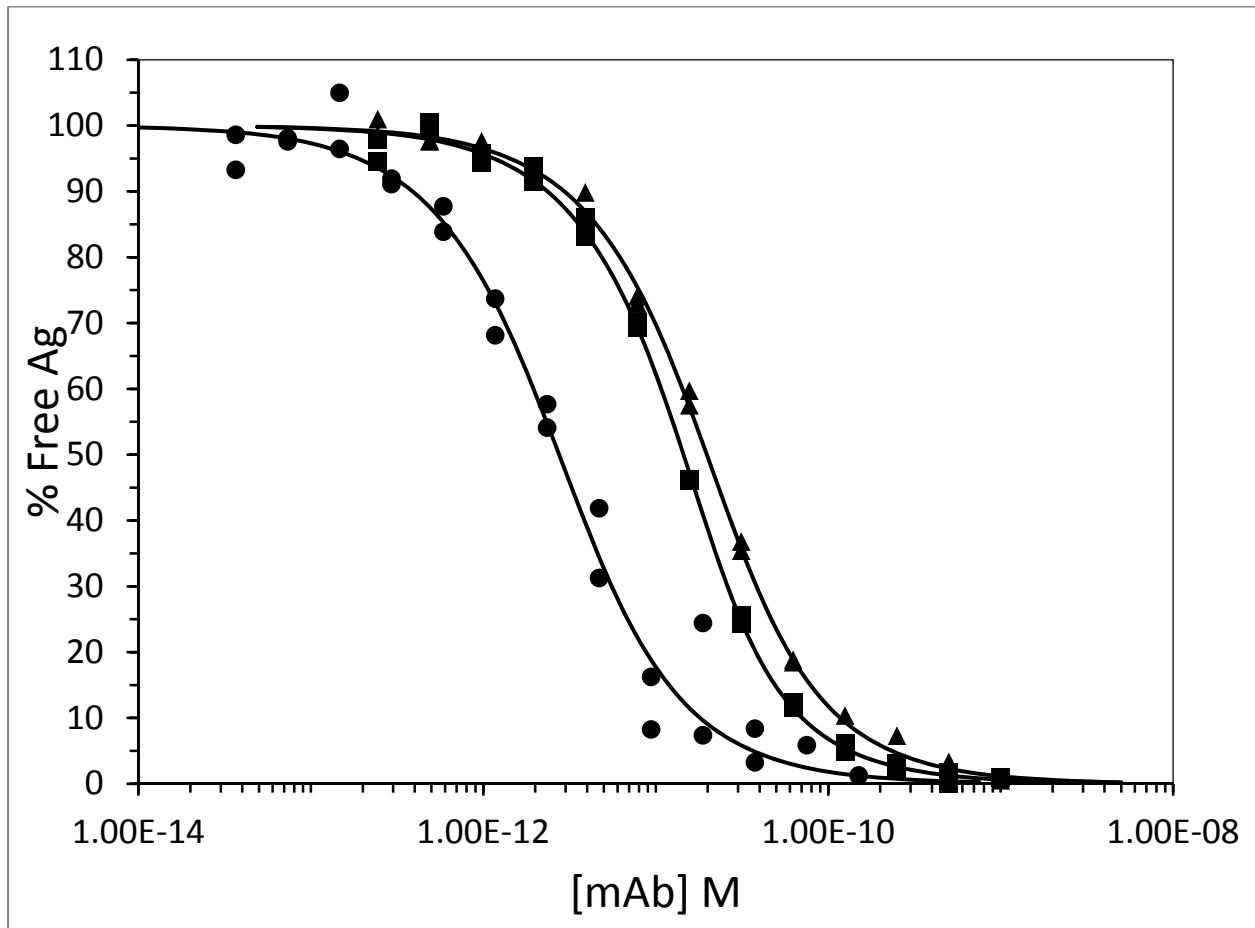

Supplement: NIHMS342444-supplement-04.pdf [file NIHMS342444-supplement-04.pdf]
