# Supplementary material
Source: PubMed Central journal article supplement (PMC4209596)

**Supplemental Figure 4.** Binding curves of XOMA3AB component mAbs with BoNT/A domains by KinExA

Percentage of free BoNT domain is plotted as a function of mAb concentration. Circle: mAb A vs. H<sub>CC</sub>, square: mAb B vs. H<sub>CN</sub>, triangle: mAb C vs. LC-H<sub>N</sub>.

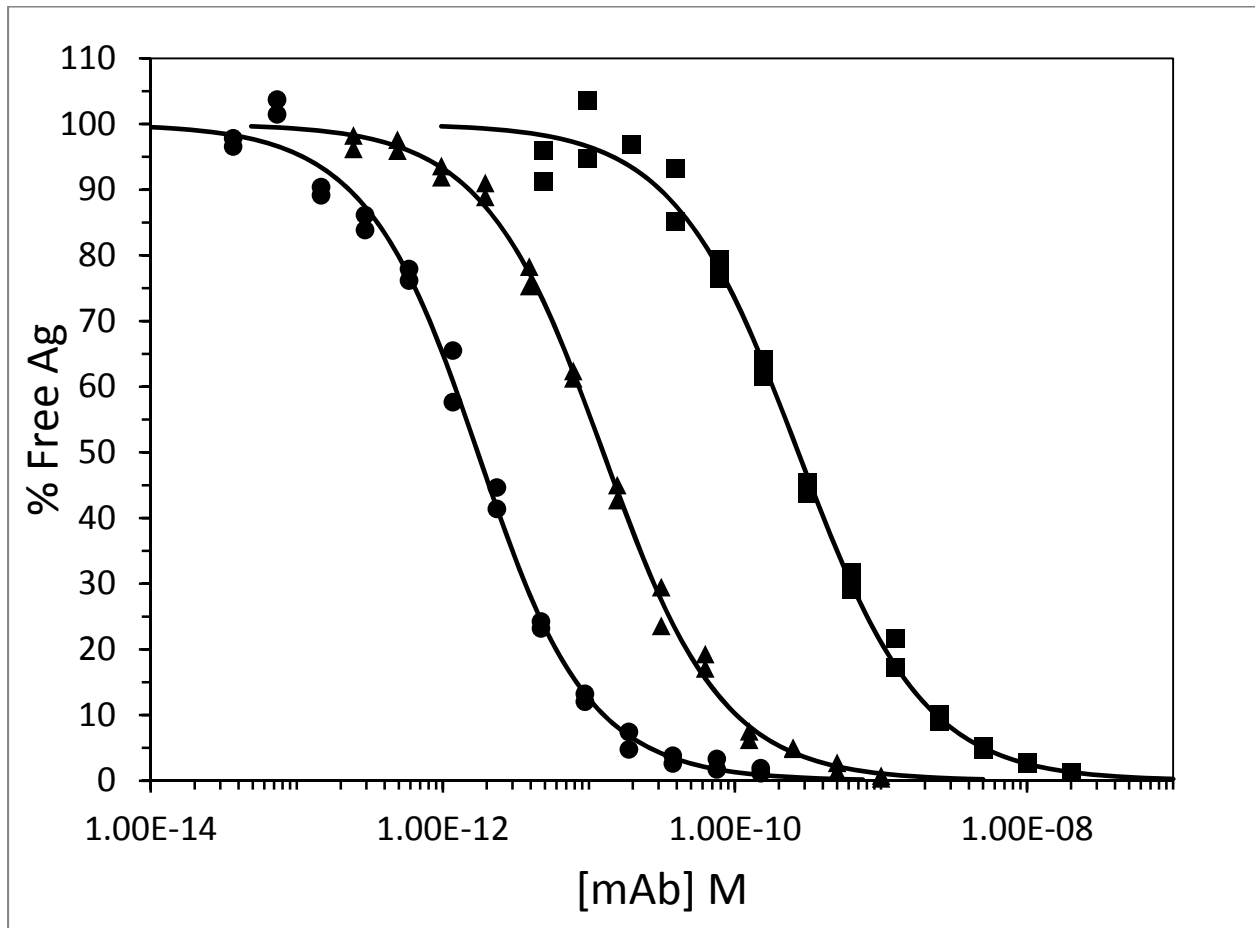

Supplement: NIHMS342444-supplement-05.pdf [file NIHMS342444-supplement-05.pdf]
